# Supplementary material for: Synthesis and structures of bis-ligated zinc complexes supported by tridentate ketoimines that initiatel-lactide polymerization
Source: Royal Society of Chemistry journal article supplement (doi:10.1039/c4dt01607f), 2014-09-26

## Supporting Information

### Synthesis and structures of *bis*-ligated zinc complexes supported by tridentate ketoimines that initiate L-lactide polymerization

Kimberly A. Gerling<sup>a</sup>, Nomaan M. Rezayee<sup>a</sup>, Arnold L. Rheingold<sup>b</sup>, David B. Green<sup>a</sup>, Joseph M. Fritsch\*<sup>a</sup>

<sup>a</sup>Department of Chemistry, Pepperdine University

<sup>b</sup>Department of Chemistry, University of California, San Diego

#### Table of contents

|                                                                                                                                        |          |
|----------------------------------------------------------------------------------------------------------------------------------------|----------|
| SI Figures 1-8. <sup>1</sup> H, <sup>13</sup> C, and <sup>19</sup> F NMR spectra of compounds <b>1 - 8</b>                             | SI-2     |
| SI Figure 9. Variable temperature <sup>1</sup> H NMR spectra of <b>8</b>                                                               | SI-16    |
| SI Figure 10. van't Hoff plot for <b>8</b>                                                                                             | SI-16    |
| SI Tables 1 and 2. Crystallographic and refinement data for <b>1-3</b> and <b>5-8</b> .                                                | SI-17-18 |
| SI Figures 11 - 14. ORTEPs of compounds <b>2, 5, 6, and 8</b>                                                                          | SI-19-20 |
| SI Table 3. Polylactides isolated from the ROP of L-lactide in bulk melt                                                               | SI-21    |
| SI Figures 15 - 16. <sup>1</sup> H and <sup>1</sup> H{ <sup>1</sup> H} NMR spectra of PLA isolated from polymerization with <b>1</b> . | SI-21-22 |
| SI Figure 17 - 18. PLA <i>M<sub>n</sub></i> versus percentage conversion                                                               | SI-23    |
| SI Figure 19 - 20. GPC-ELSD chromatograms of PLA isolated from double feed                                                             | SI-24    |
| SI Figures 21-23 <sup>1</sup> H and <sup>19</sup> F NMR spectra of <i>in situ</i> zinc alkoxide                                        | SI-25-26 |

**SI Figure 1.** NMR spectra of compound **1**.

$^1\text{H}$  NMR spectrum of **1**

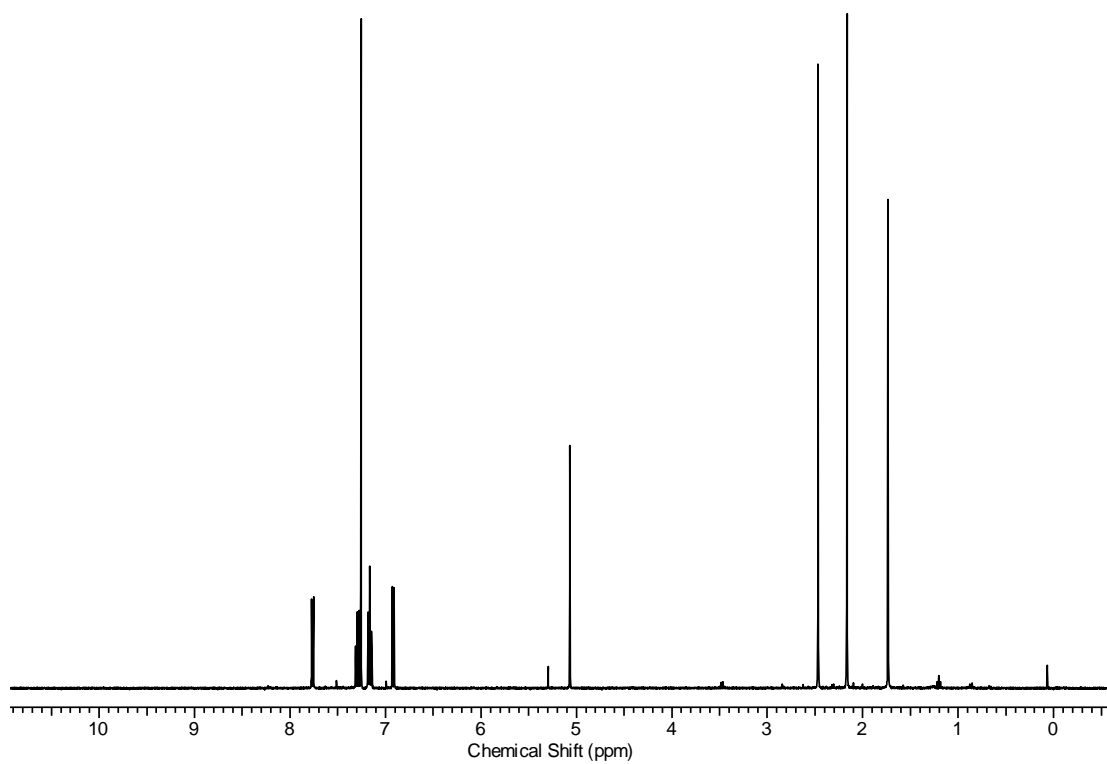

$^{13}\text{C}$  NMR spectrum of **1**

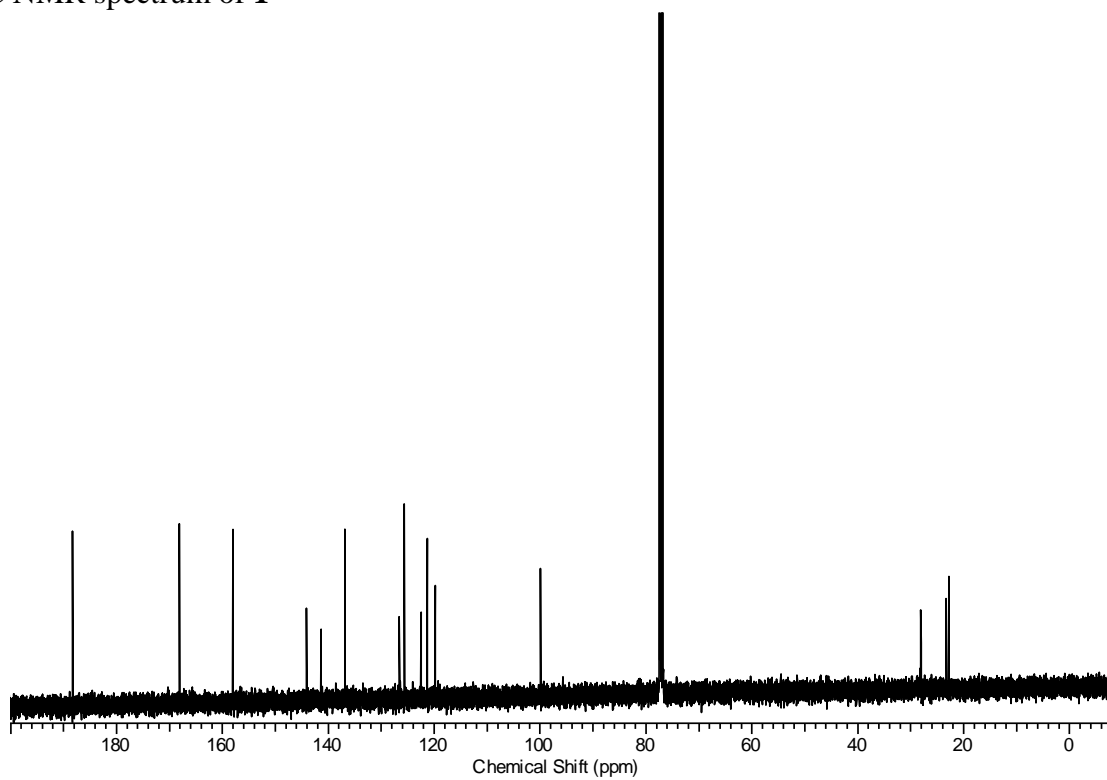

**SI Figure 2.** NMR spectra of compound **2**.

$^1\text{H}$  NMR spectrum of **2**

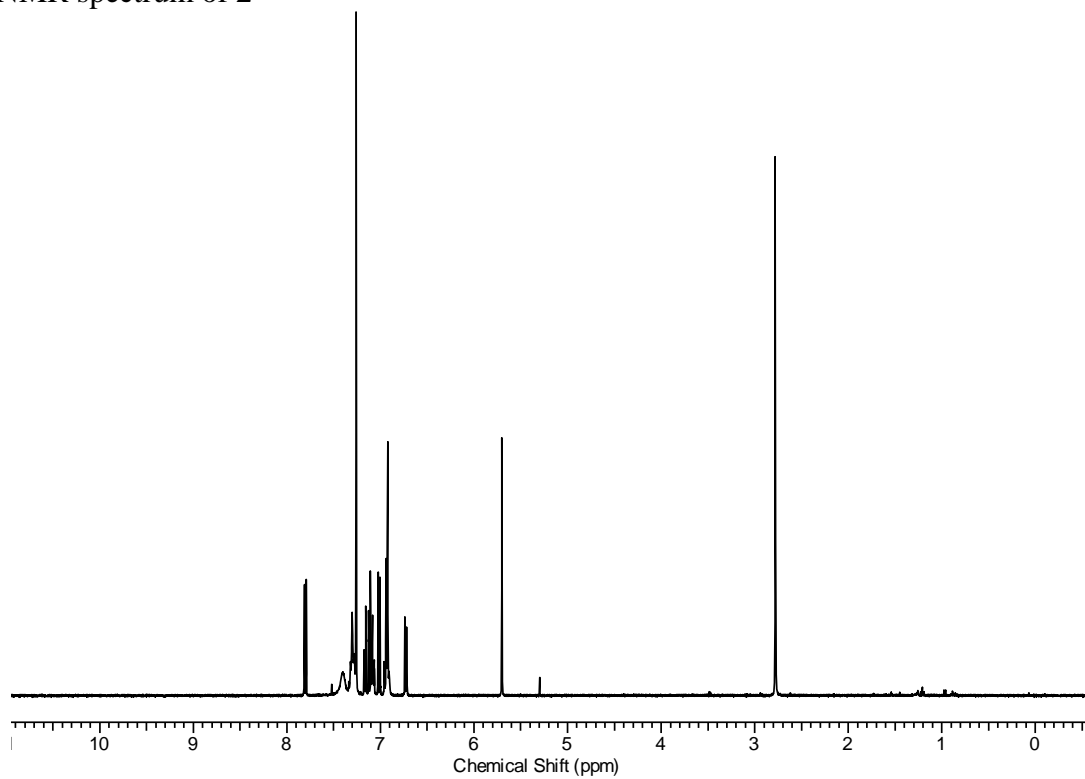

$^{13}\text{C}$  NMR spectrum of **2**

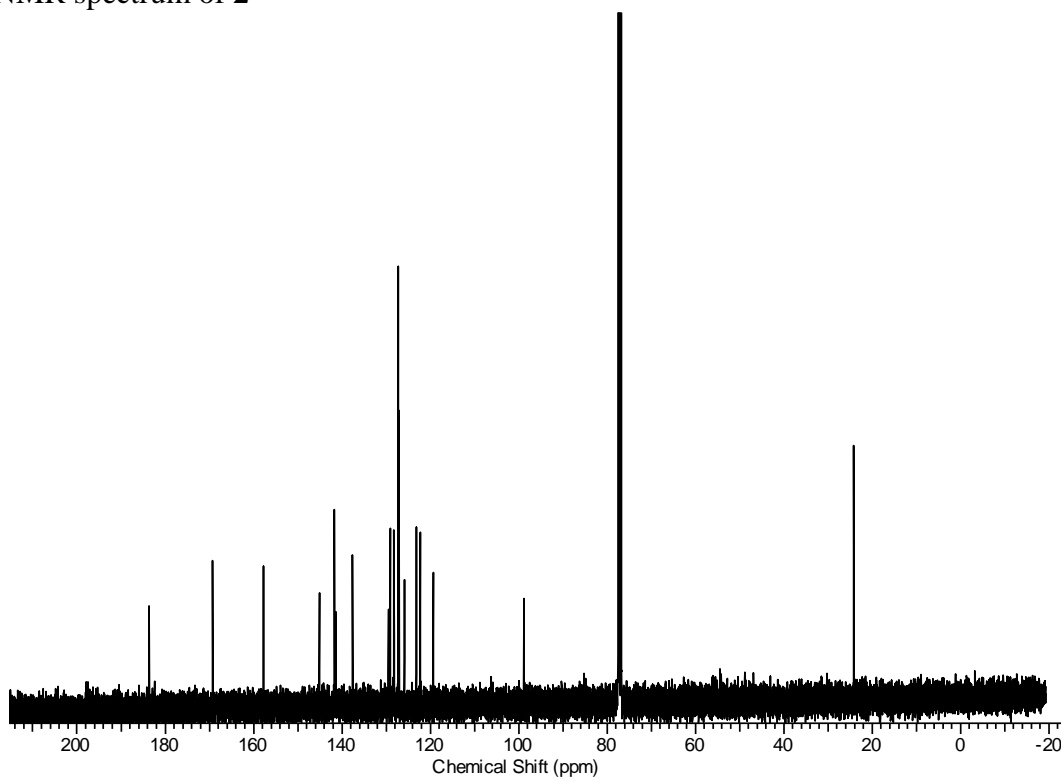

**SI Figure 3.** NMR spectra of compound **3**.

$^1\text{H}$  NMR spectrum of **3**

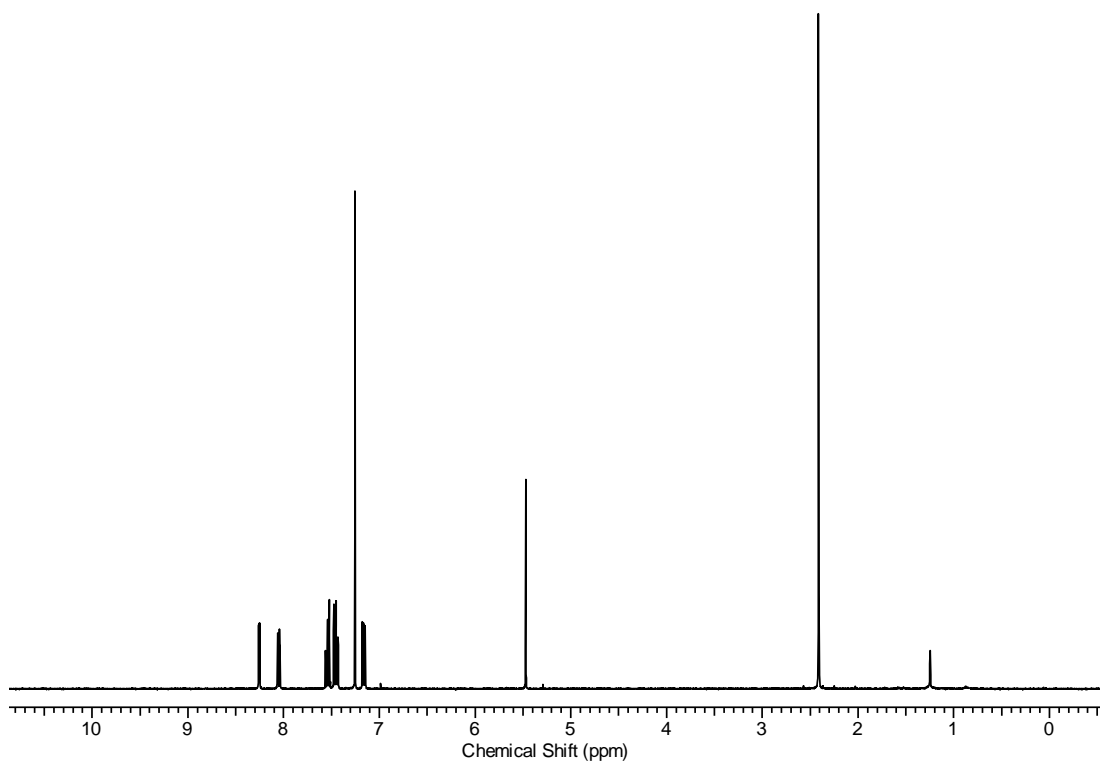

$^{13}\text{C}$  NMR spectrum of **3**

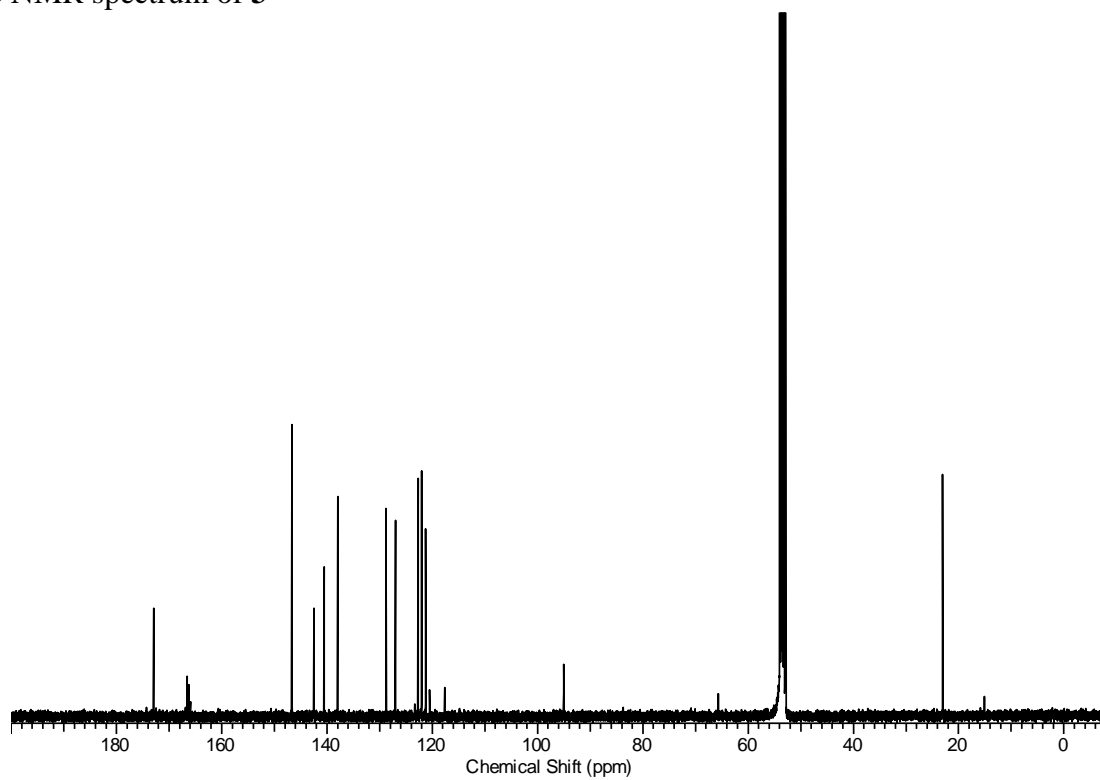

$^{19}\text{F}$  NMR spectrum of **3**

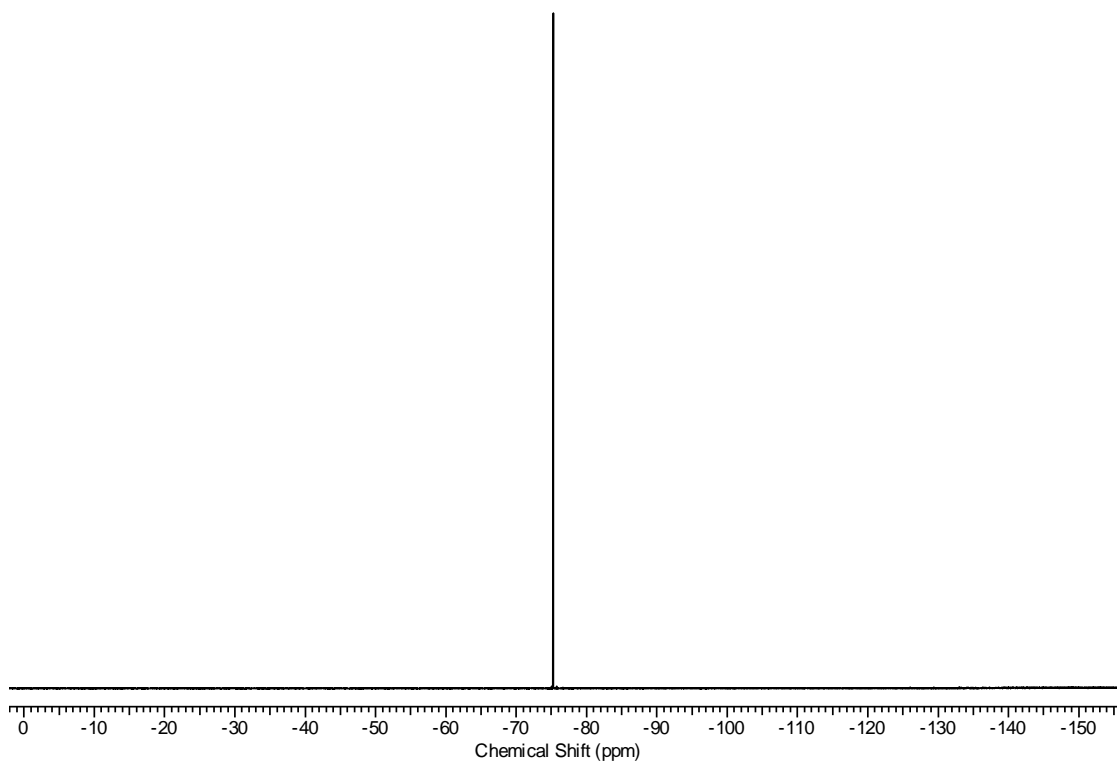

**SI Figure 4.** NMR spectra of compound **4**.

$^1\text{H}$  NMR spectrum of **4**

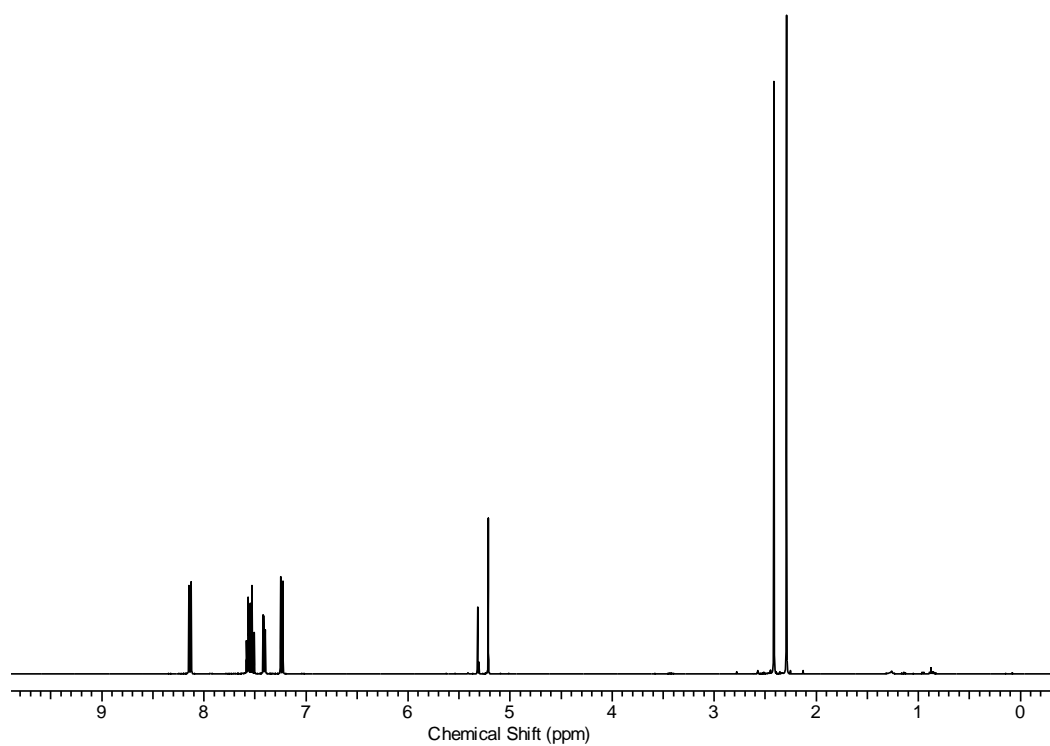

$^{13}\text{C}$  NMR spectrum of **4**

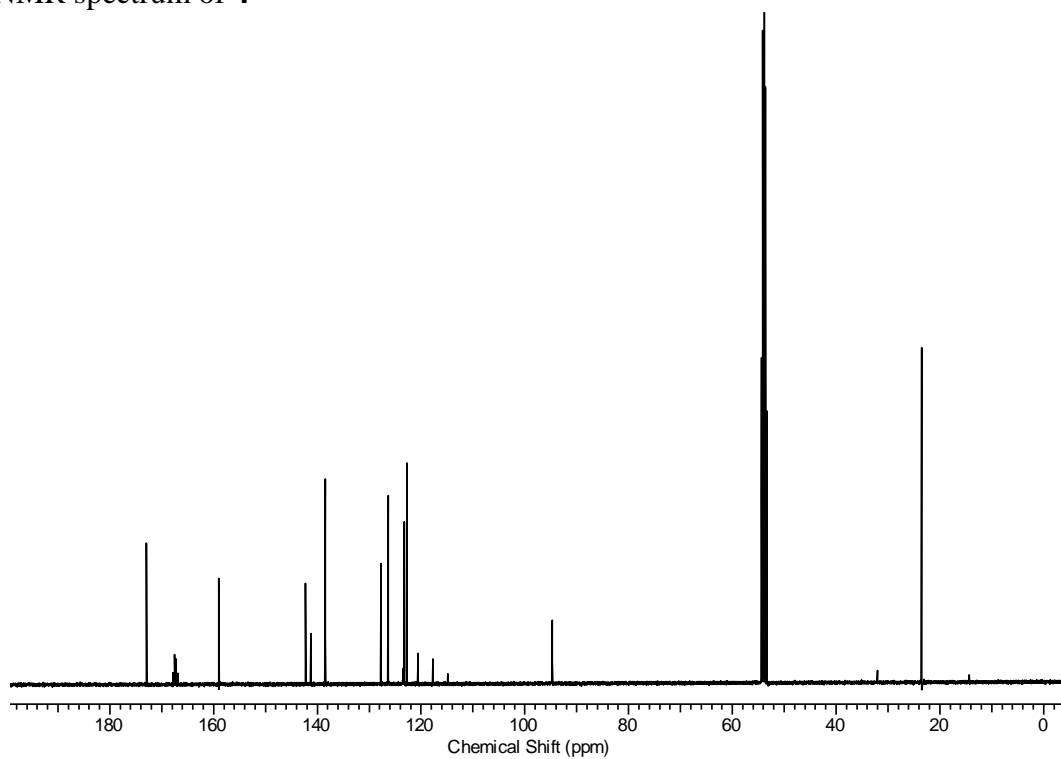

$^{19}\text{F}$  NMR spectrum of **4**

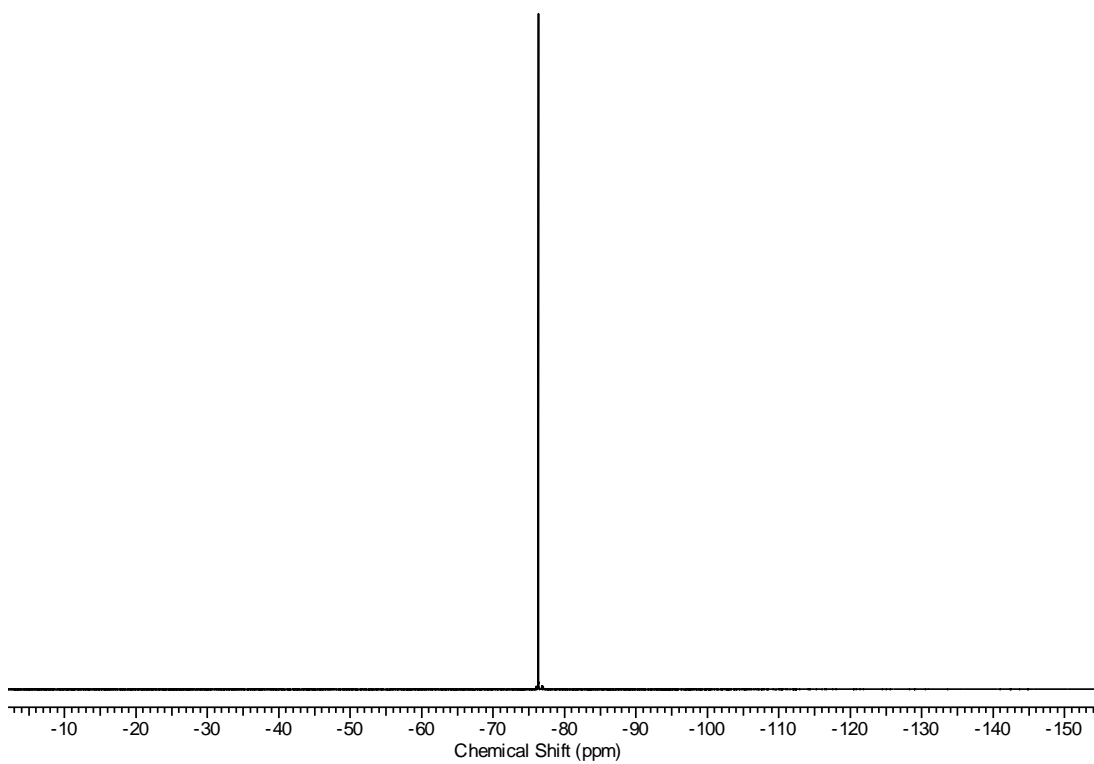

**SI Figure 5.** NMR spectra of compound **5**.

$^1\text{H}$  NMR spectrum of **5**

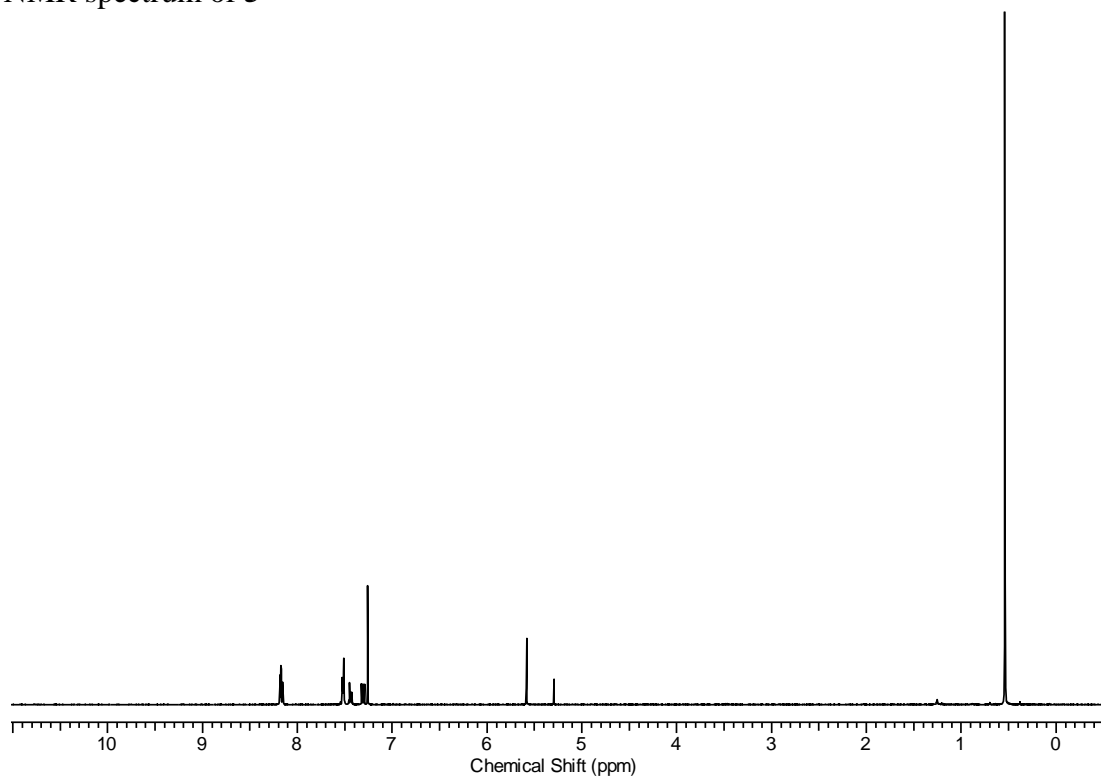

$^{13}\text{C}$  NMR spectrum of **5**

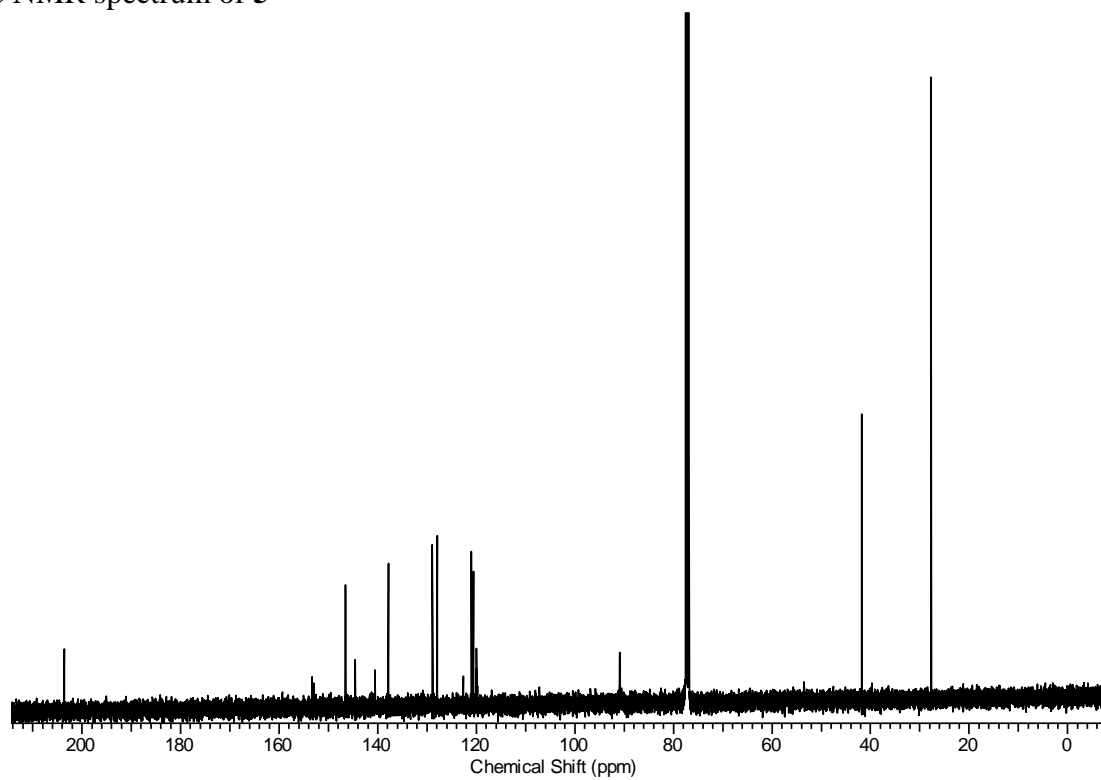



$^{19}\text{F}$  NMR spectrum of **5**

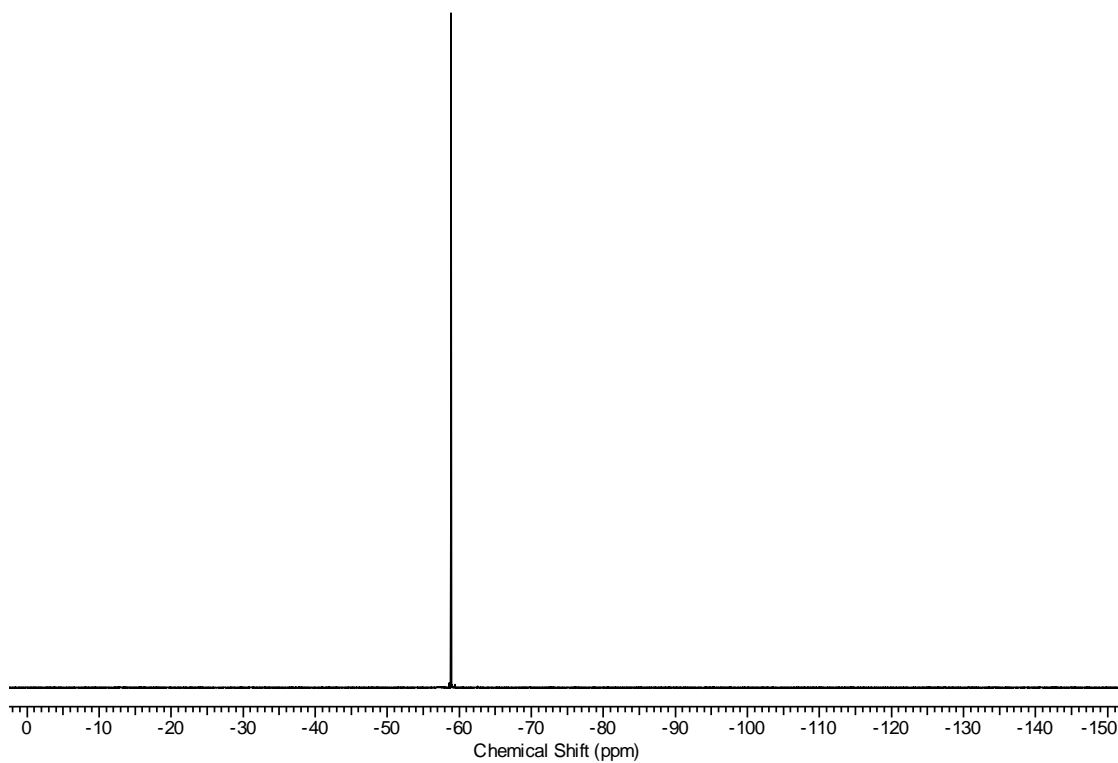

**SI Figure 6.** NMR spectra of compound **6**.

$^1\text{H}$  NMR spectrum of **6**

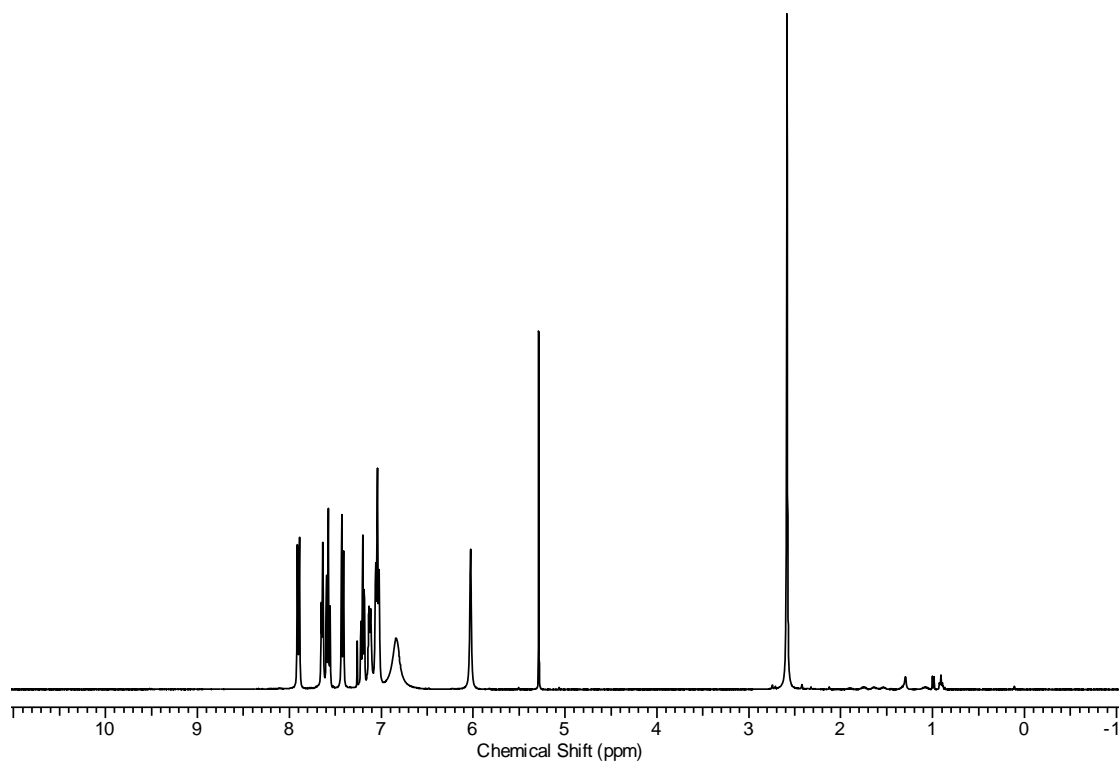

$^{13}\text{C}$  NMR spectrum of **6**

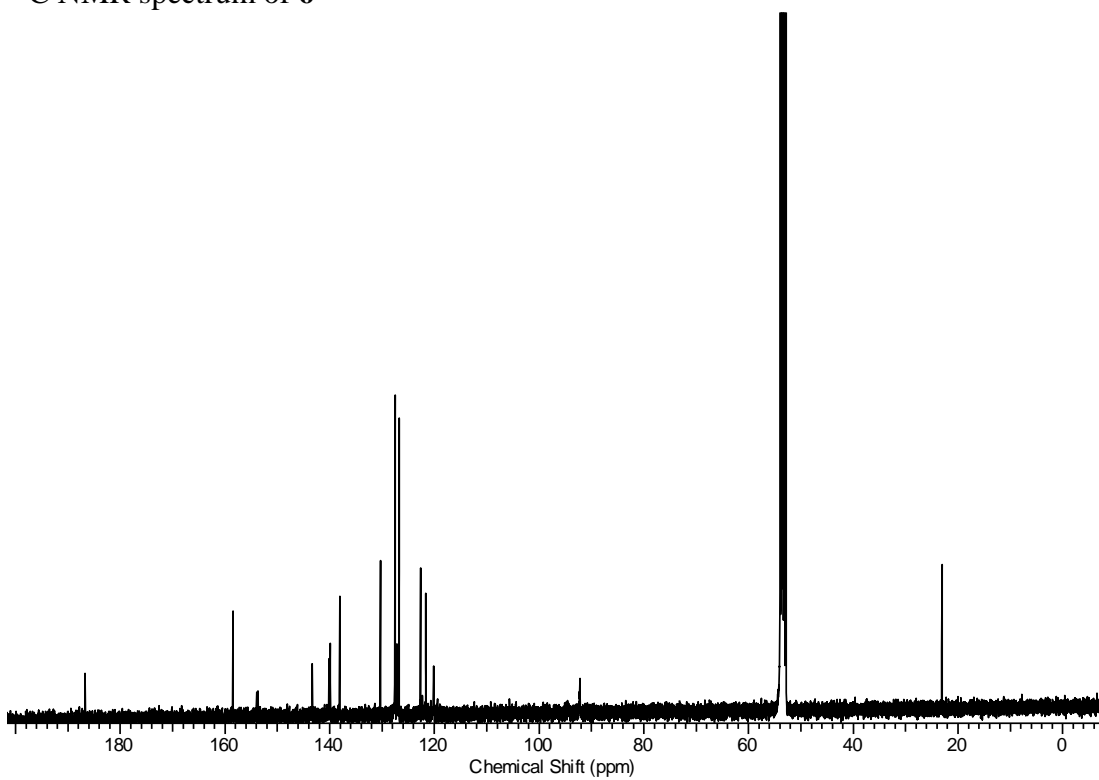

$^{19}\text{F}$  NMR spectrum of **6**

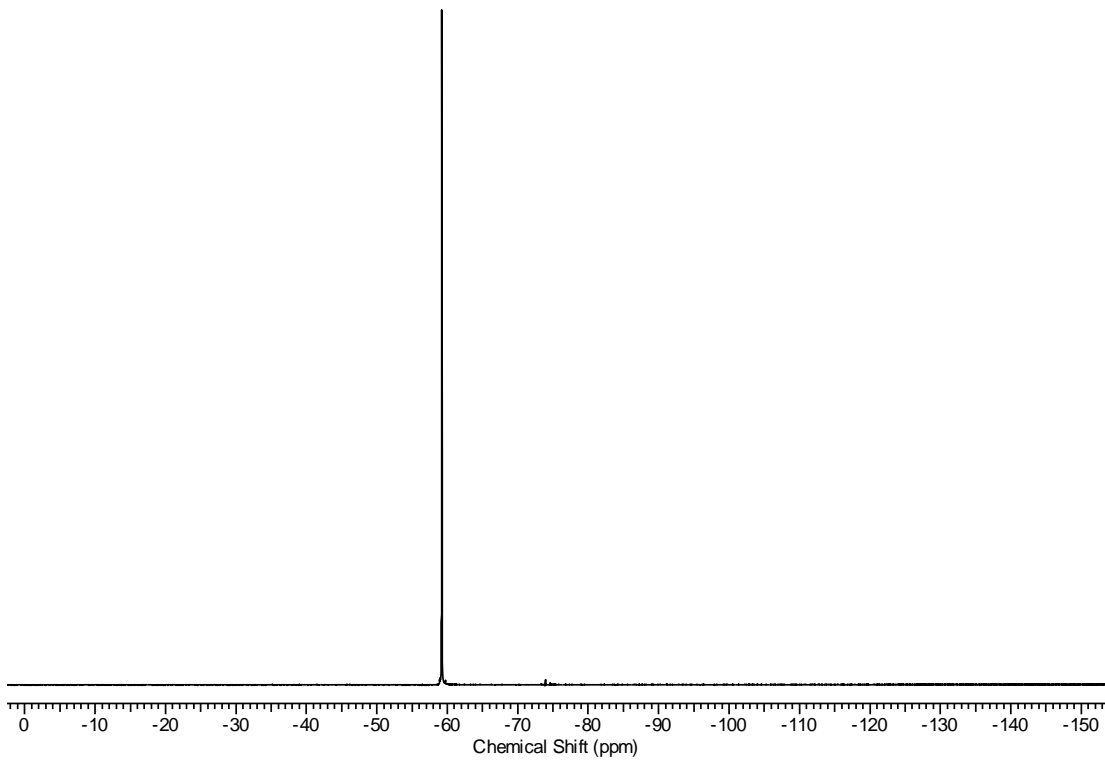

**SI Figure 7.** NMR spectra of compound **7**.

$^1\text{H}$  NMR spectrum of **7**

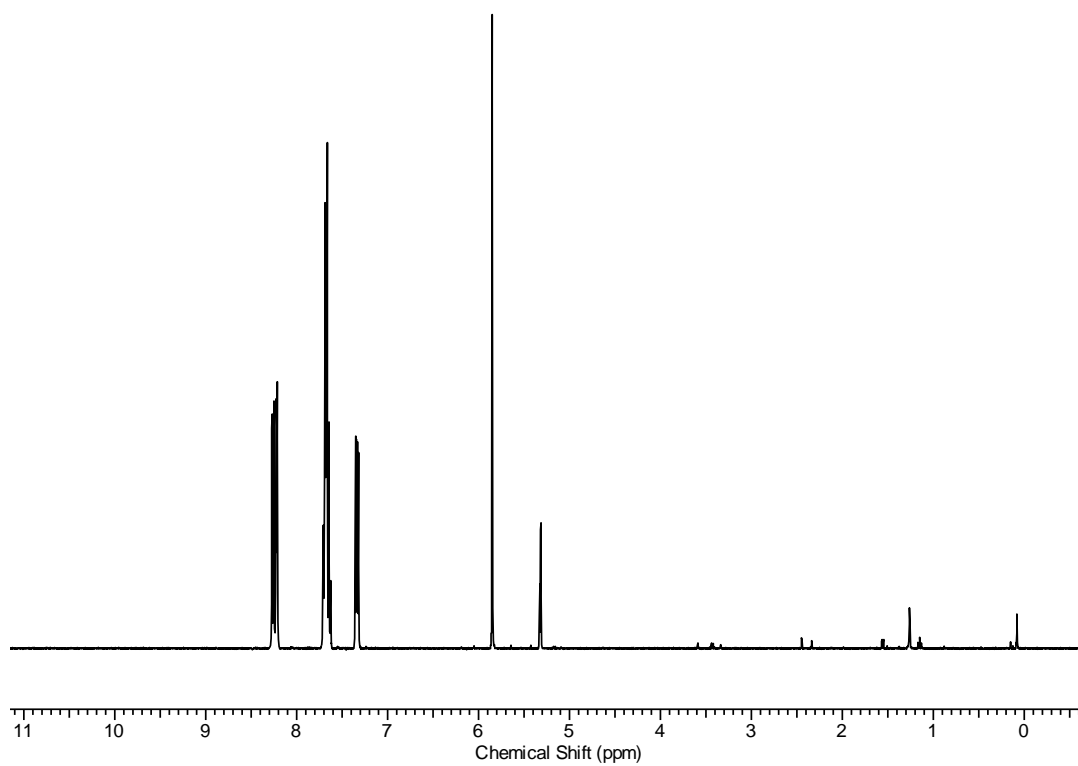

$^{13}\text{C}$  NMR spectrum of **7**

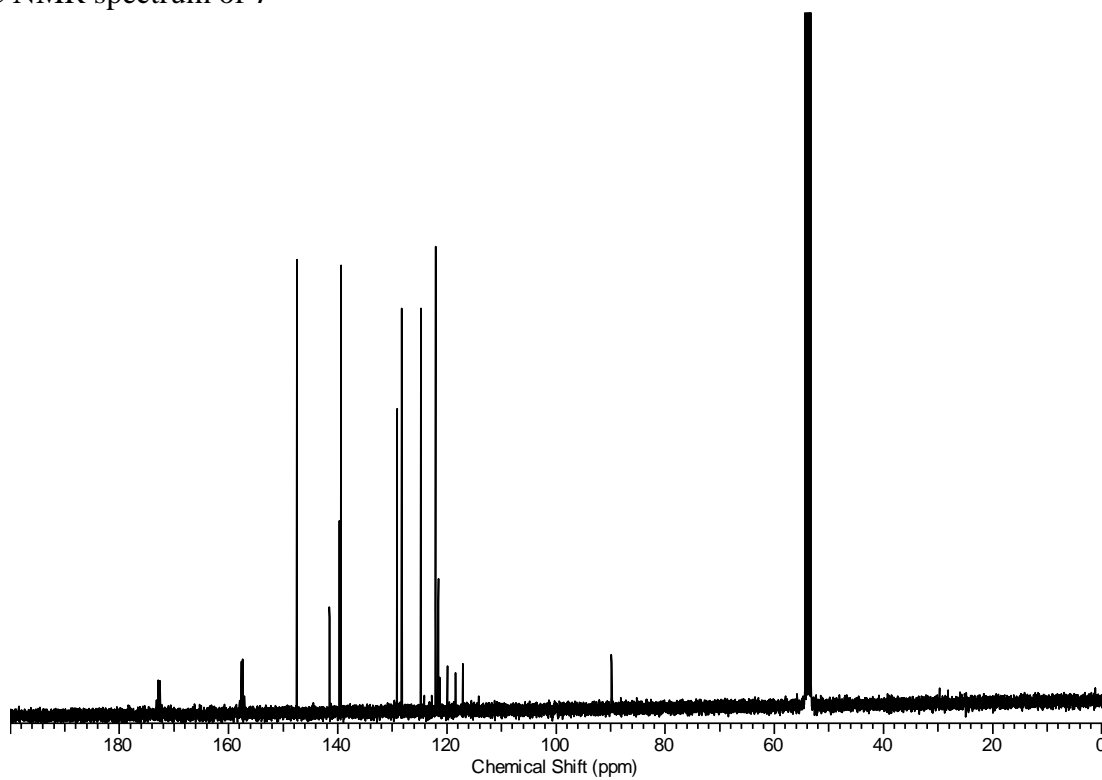

$^{19}\text{F}$  NMR spectrum of **7**

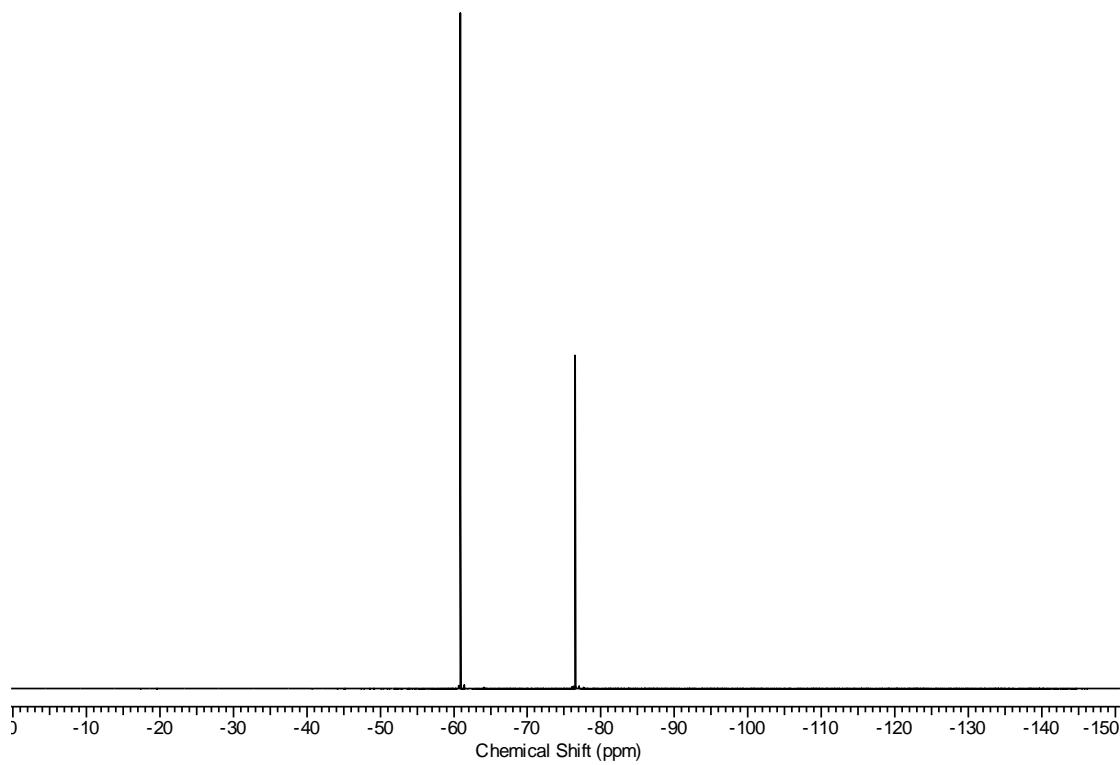

**SI Figure 8.** NMR spectra of compound **8**.

$^1\text{H}$  NMR spectrum of **8**

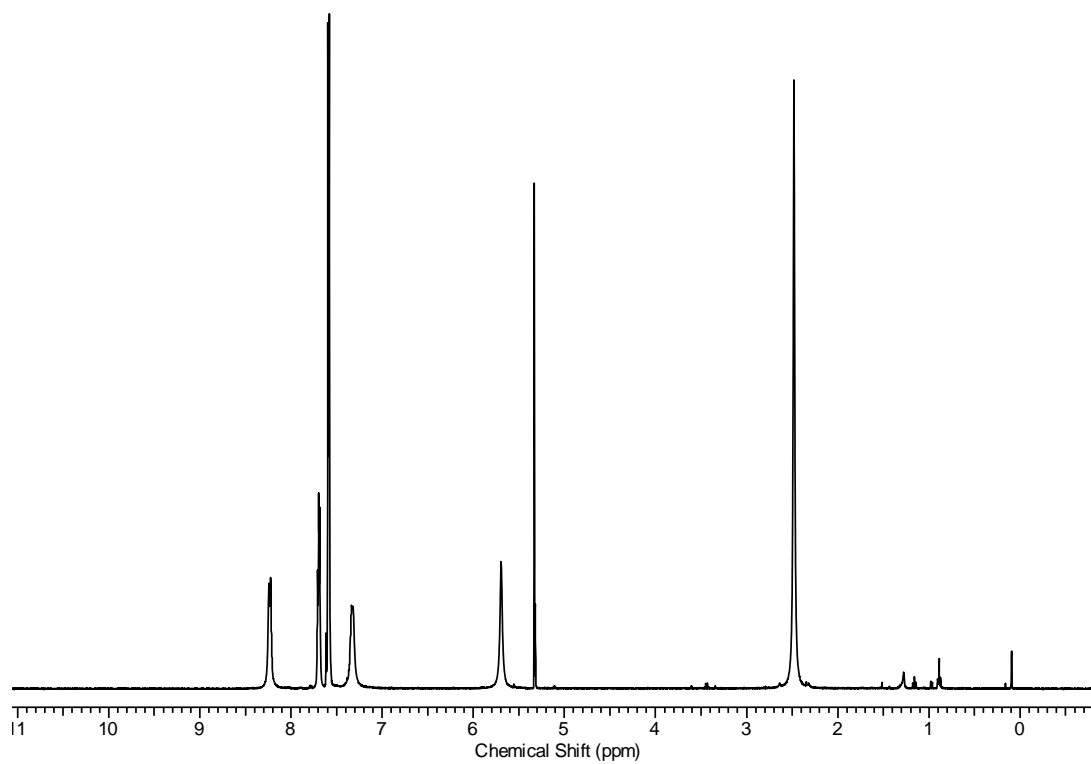

$^{13}\text{C}$  NMR spectrum of **8**

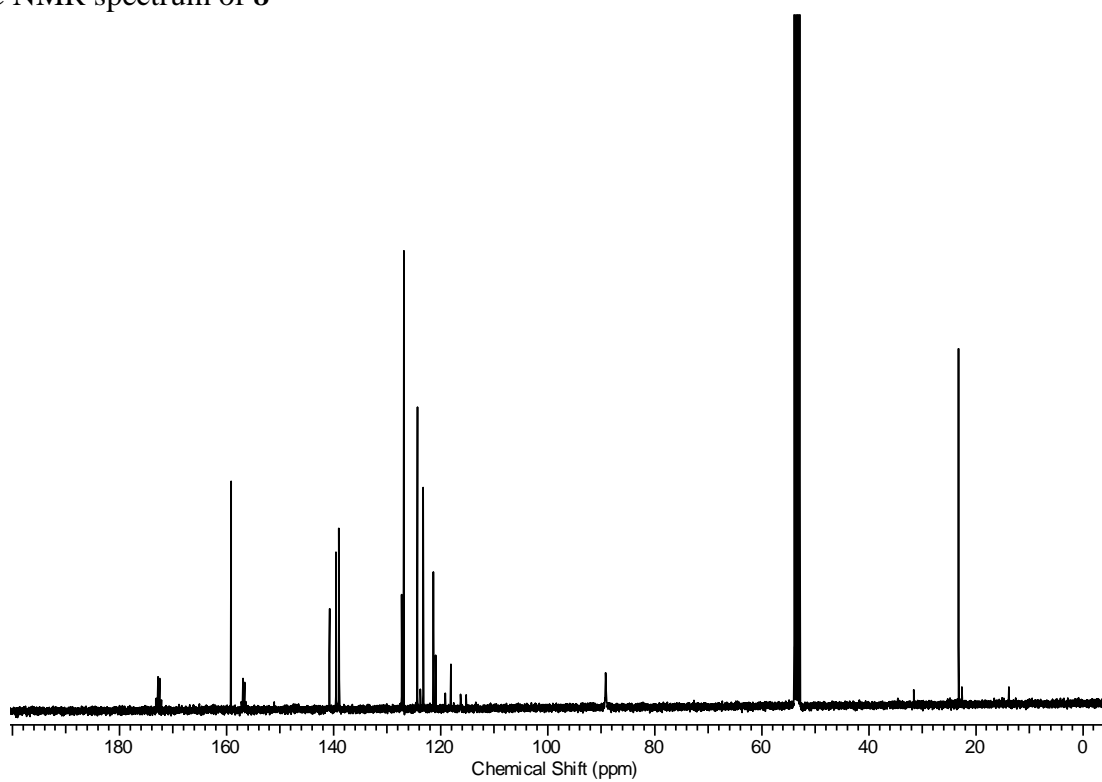

$^{19}\text{F}$  NMR spectrum of **8**

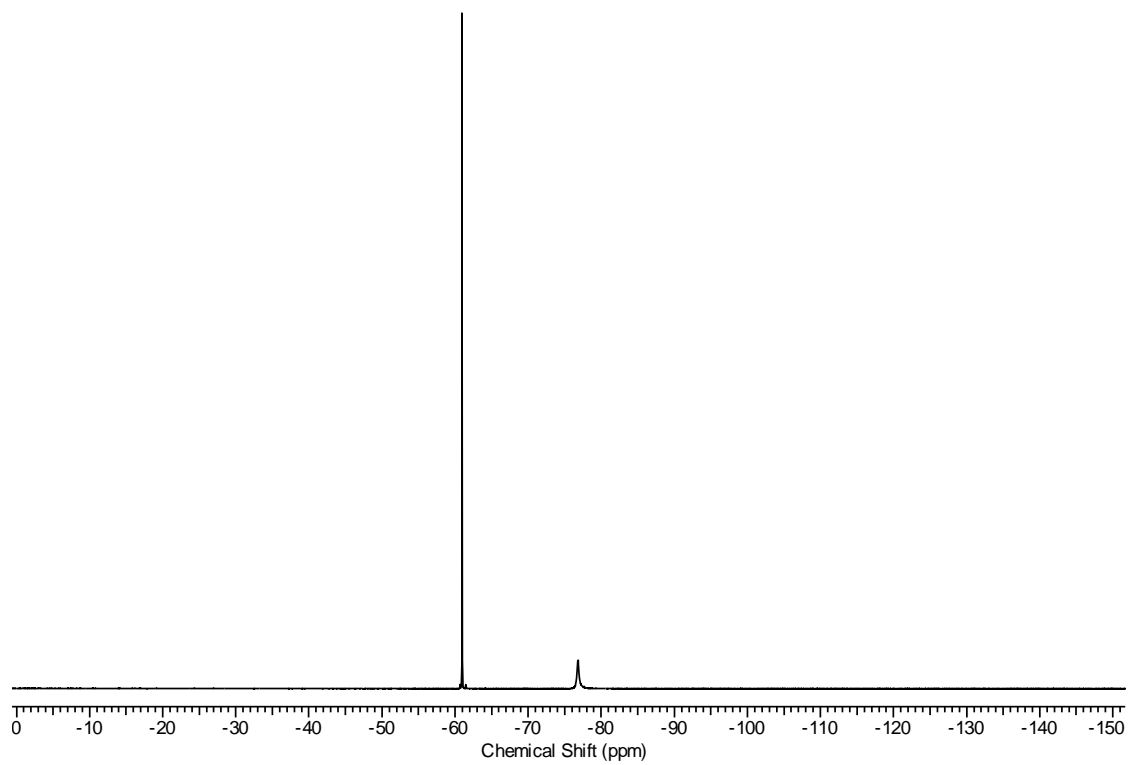

**SI Fig. 9** VT  $^1\text{H}$  NMR spectra of **8** in the temperature range of 213 to 300 K in  $\text{CD}_2\text{Cl}_2$ .

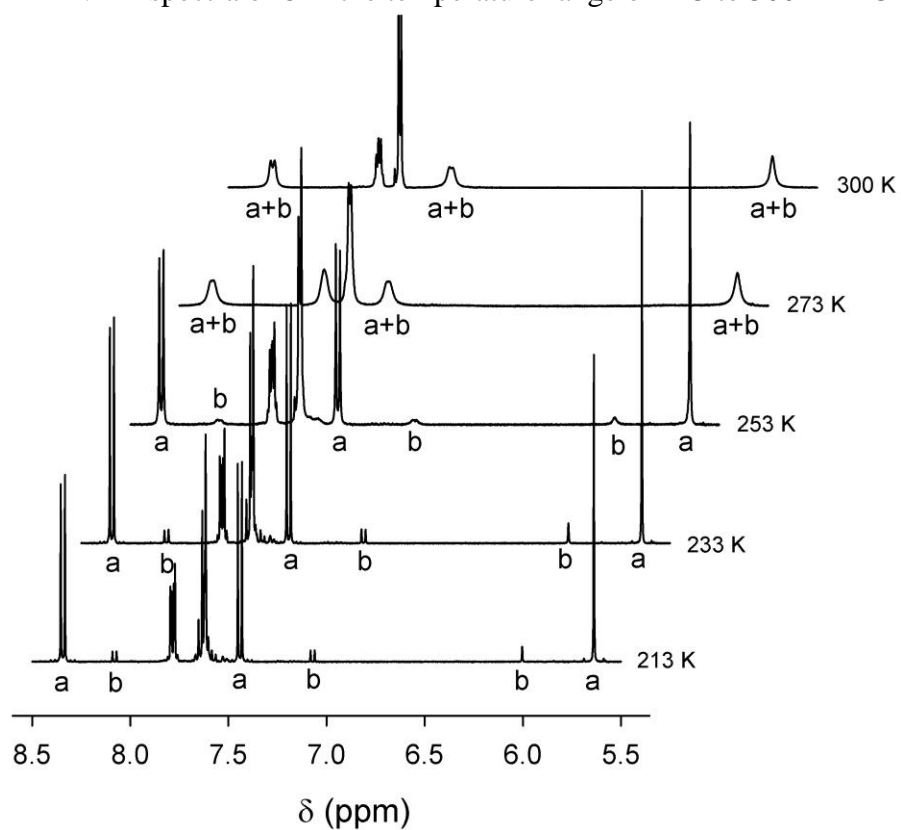

**SI Fig 10.** van't Hoff plot for **8** with varying temperature from 213 to 300K where  $a = \mathbf{8}$  and  $b = \mathbf{8}'$ .

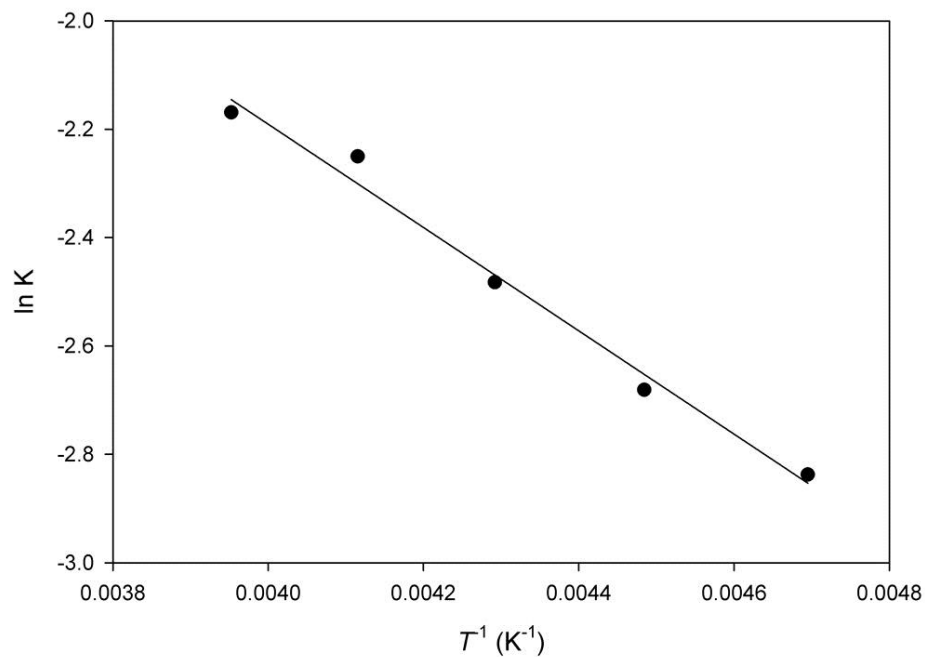



## Crystallographic Data and ORTEP Diagrams

**SI Table 1.** Crystallographic and refinement data for **1-3** and **5**.

|                                                    | <b>1</b>                                                         | <b>2•4CH<sub>2</sub>Cl<sub>2</sub><sup>a</sup></b>                               | <b>3</b>                                                                        | <b>5•Et<sub>2</sub>O</b>                                                        |
|----------------------------------------------------|------------------------------------------------------------------|----------------------------------------------------------------------------------|---------------------------------------------------------------------------------|---------------------------------------------------------------------------------|
| Formula                                            | C <sub>30</sub> H <sub>30</sub> N <sub>4</sub> O <sub>2</sub> Zn | C <sub>54</sub> H <sub>46</sub> Cl <sub>8</sub> N <sub>4</sub> O <sub>2</sub> Zn | C <sub>28</sub> H <sub>20</sub> F <sub>6</sub> N <sub>4</sub> O <sub>2</sub> Zn | C <sub>34</sub> H <sub>32</sub> F <sub>6</sub> N <sub>4</sub> O <sub>2</sub> Zn |
| FW                                                 | 543.95                                                           | 1131.92                                                                          | 623.85                                                                          | 708.01                                                                          |
| <i>T</i> (K)                                       | 100                                                              | 100                                                                              | 100                                                                             | 100                                                                             |
| Crystal system                                     | Monoclinic                                                       | Monoclinic                                                                       | Monoclinic                                                                      | Monoclinic                                                                      |
| Space group                                        | P2 <sub>1</sub> /n                                               | C2/c                                                                             | Cc                                                                              | P2 <sub>1</sub> /n                                                              |
| <i>a</i> / Å                                       | 12.3863(9)                                                       | 18.4261(19)                                                                      | 10.9999(5)                                                                      | 13.728(2)                                                                       |
| <i>b</i> / Å                                       | 11.7173(8)                                                       | 18.3114(19)                                                                      | 21.1507(11)                                                                     | 15.472(2)                                                                       |
| <i>c</i> / Å                                       | 17.9207(13)                                                      | 17.7719(19)                                                                      | 12.5158(5)                                                                      | 15.449(2)                                                                       |
| $\alpha$ / °                                       | 90                                                               | 90                                                                               | 90                                                                              | 90                                                                              |
| $\beta$ / °                                        | 95.189(3)                                                        | 105.912(1)                                                                       | 112.964(1)                                                                      | 103.124(2)                                                                      |
| $\gamma$ / °                                       | 90                                                               | 90                                                                               | 90                                                                              | 90                                                                              |
| <i>V</i> / Å <sup>3</sup>                          | 2590.2(3)                                                        | 5766.6(1)                                                                        | 2681.1(2)                                                                       | 2642.2(3)                                                                       |
| <i>Z</i>                                           | 4                                                                | 4                                                                                | 4                                                                               | 4                                                                               |
| <i>D<sub>c</sub></i> / g cm <sup>-3</sup>          | 1.395                                                            | 1.304                                                                            | 1.546                                                                           | 1.472                                                                           |
| $\mu$ / mm <sup>-1</sup>                           | 0.983                                                            | 0.838                                                                            | 0.992                                                                           | 0.842                                                                           |
| <i>F</i> (000)                                     | 1136                                                             | 2320                                                                             | 1264                                                                            | 1456                                                                            |
| Crystal color                                      | yellow                                                           | orange                                                                           | yellow                                                                          | yellow                                                                          |
| Ind. Ref.                                          | 7734                                                             | 8315                                                                             | 4616                                                                            | 5445                                                                            |
| Obs. Ref.                                          | 19876                                                            | 38222                                                                            | 16741                                                                           | 22551                                                                           |
| <i>R<sub>int</sub></i>                             | 0.0457                                                           | 0.1026                                                                           | 0.0274                                                                          | 0.0716                                                                          |
| GOOF on <i>F</i> <sup>2</sup>                      | 1.056                                                            | 1.053                                                                            | 1.071                                                                           | 1.050                                                                           |
| <i>R<sub>1</sub></i> [ <i>I</i> > 2σ( <i>I</i> )]  | 0.0499                                                           | 0.0445                                                                           | 0.0273                                                                          | 0.0637                                                                          |
| <i>wR<sub>2</sub></i> [ <i>I</i> > 2σ( <i>I</i> )] | 0.1303                                                           | 0.1246                                                                           | 0.0623                                                                          | 0.1469                                                                          |

<sup>a</sup> One more region of unit cell containing a solvent molecule could not be modeled or identified. This region was squeezed from final refinements.

**SI Table 2.** Crystallographic and refinement data for **6-8**.

|                                                              | <b>6</b>                                                                        | <b>7</b>                                                                         | <b>8</b>                                                                         |
|--------------------------------------------------------------|---------------------------------------------------------------------------------|----------------------------------------------------------------------------------|----------------------------------------------------------------------------------|
| Formula                                                      | C <sub>44</sub> H <sub>38</sub> F <sub>6</sub> N <sub>4</sub> O <sub>3</sub> Zn | C <sub>28</sub> H <sub>14</sub> F <sub>12</sub> N <sub>4</sub> O <sub>2</sub> Zn | C <sub>30</sub> H <sub>18</sub> F <sub>12</sub> N <sub>4</sub> O <sub>2</sub> Zn |
| FW                                                           | 850.15                                                                          | 731.80                                                                           | 759.85                                                                           |
| <i>T</i> (K)                                                 | 150                                                                             | 100                                                                              | 100                                                                              |
| Crystal system                                               | Monoclinic                                                                      | Monoclinic                                                                       | Monoclinic                                                                       |
| Space group                                                  | P2 <sub>1</sub> /n                                                              | P2 <sub>1</sub> /c                                                               | P2 <sub>1</sub> /n                                                               |
| <i>a</i> / Å                                                 | 11.8222(6)                                                                      | 10.944(3)                                                                        | 10.8018(4)                                                                       |
| <i>b</i> / Å                                                 | 14.4520(8)                                                                      | 15.110(4)                                                                        | 16.7358(7)                                                                       |
| <i>c</i> / Å                                                 | 23.0665(13)                                                                     | 17.767(4)                                                                        | 16.7518(7)                                                                       |
| $\alpha$ / °                                                 | 90                                                                              | 90                                                                               | 90                                                                               |
| $\beta$ / °                                                  | 93.491(1)                                                                       | 104.388(1)                                                                       | 103.113(1)                                                                       |
| $\gamma$ / °                                                 | 90                                                                              | 90                                                                               | 90                                                                               |
| <i>V</i> / Å <sup>3</sup> )                                  | 3933.7(4)                                                                       | 2846.0(1)                                                                        | 3699(2)                                                                          |
| <i>Z</i>                                                     | 4                                                                               | 4                                                                                | 4                                                                                |
| <i>D<sub>c</sub></i> / g cm <sup>-3</sup>                    | 1.436                                                                           | 1.708                                                                            | 1.711                                                                            |
| $\mu$ / mm <sup>-1</sup>                                     | 0.699                                                                           | 0.977                                                                            | 0.946                                                                            |
| <i>F</i> (000)                                               | 1752                                                                            | 1456                                                                             | 1520                                                                             |
| Crystal color                                                | yellow                                                                          | orange                                                                           | orange                                                                           |
| Ind. Ref.                                                    | 7227                                                                            | 5767                                                                             | 21113                                                                            |
| Obs. Ref.                                                    | 34376                                                                           | 21545                                                                            | 6007                                                                             |
| <i>R<sub>int</sub></i>                                       | 0.0429                                                                          | 0.0347                                                                           | 0.0279                                                                           |
| GOOF on <i>F</i> <sup>2</sup>                                | 1.005                                                                           | 1.020                                                                            | 1.006                                                                            |
| <i>R</i> <sub>1</sub> [ <i>I</i> > 2 $\sigma$ ( <i>I</i> )]  | 0.0396                                                                          | 0.0272                                                                           | 0.0328                                                                           |
| <i>wR</i> <sub>2</sub> [ <i>I</i> > 2 $\sigma$ ( <i>I</i> )] | 0.1052                                                                          | 0.0614                                                                           | 0.0848                                                                           |

## ORTEP Diagrams

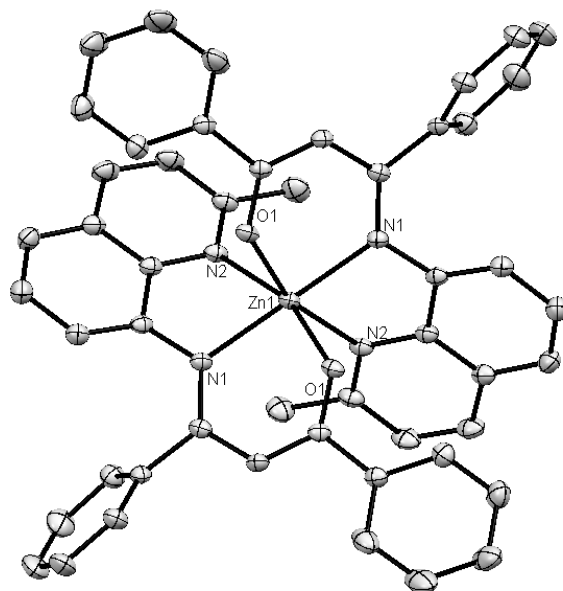

**SI Figure 11.** ORTEP of the molecular structure of **2** with thermal ellipsoids drawn at the 50% probability level. The hydrogen atoms and dichloromethane solvent molecules removed for clarity.

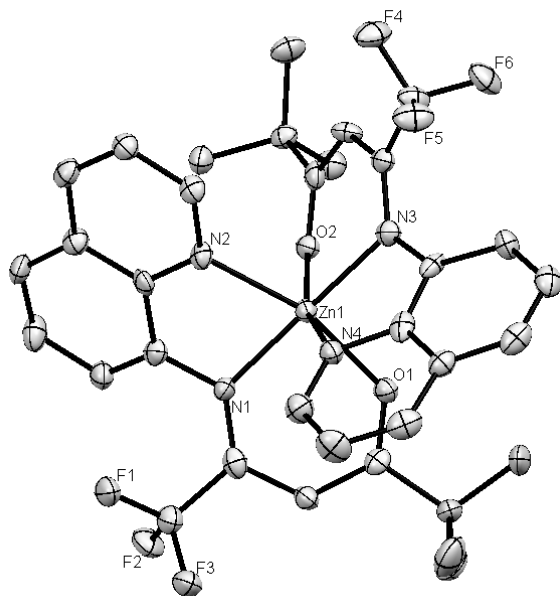

**SI Figure 12.** ORTEP of the molecular structure of **5** with thermal ellipsoids drawn at the 50% probability level. The hydrogen atoms are omitted for clarity.

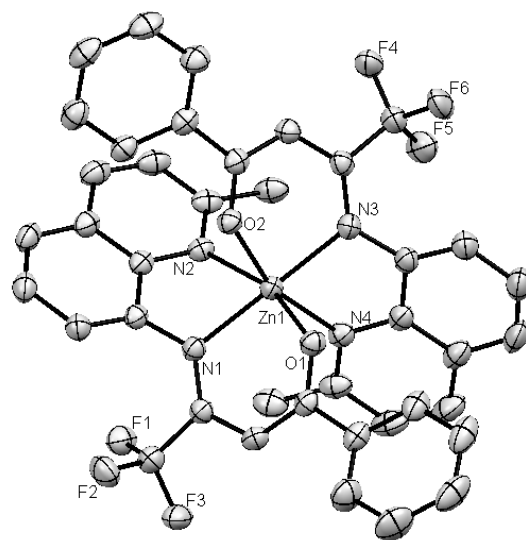

**SI Figure 13.** ORTEP of the molecular structure of **6** with thermal ellipsoids drawn at the 50% probability level. The hydrogen atoms and one molecule of diethyl ether are omitted for clarity.

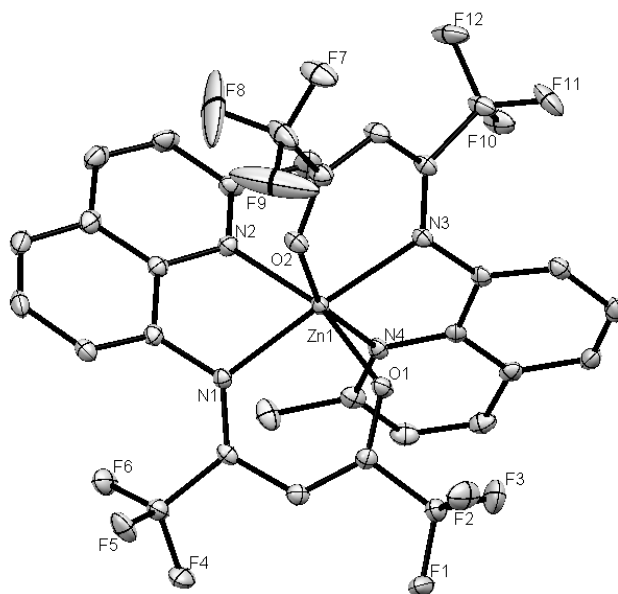

**SI Figure 14.** ORTEP of the molecular structure of **8** with thermal ellipsoids drawn at the 50% probability level. The hydrogen atoms are omitted for clarity.

**SI Table 3.** Poly lactides isolated from the ROP of L-lactide in bulk melt at 100 °C.

| Entry | Cmpd <sup>a</sup> | Phenol / Zn | Time (min) | Conv. <sup>b</sup> (%) | $M_{n, calc}$ <sup>c</sup> (10 <sup>3</sup> , g/mol) | $M_{n, obs}$ <sup>d</sup> (10 <sup>3</sup> , g/mol) | PDI ( $M_w/M_n$ ) |
|-------|-------------------|-------------|------------|------------------------|------------------------------------------------------|-----------------------------------------------------|-------------------|
| 1     | <b>1</b>          | 0           | 15         | 85                     | 6.1                                                  | 42.1                                                | 1.71              |
| 2     | <b>1</b>          | 1           | 15         | 99                     | 7.1                                                  | 11.4                                                | 1.84              |
| 3     | <b>3</b>          | 0           | 60         | 12                     | 0.9                                                  | 27.6                                                | 1.34              |
| 4     | <b>3</b>          | 1           | 60         | 61                     | 4.4                                                  | 9.0                                                 | 1.05              |
| 5     | <b>5</b>          | 0           | 60         | 3                      | 0.2                                                  | 3.01                                                | 1.17              |
| 6     | <b>5</b>          | 1           | 60         | 44                     | 3.2                                                  | 3.7                                                 | 1.28              |
| 7     | <b>6</b>          | 0           | 60         | 9                      | 0.7                                                  | 12.4                                                | 1.37              |
| 8     | <b>6</b>          | 1           | 60         | 83                     | 6.0                                                  | 5.6                                                 | 1.12              |
| 9     | <b>8</b>          | 0           | 1440       | 27                     | 1.9                                                  | 15.53                                               | 1.39              |
| 10    | <b>8</b>          | 1           | 1440       | 67                     | 4.8                                                  | 8.28                                                | 1.35              |

<sup>a</sup> All reactions were conducted without solvent at 100 °C with L-lac:Zn 50:1. <sup>b</sup> Lactide conversion as determined by <sup>1</sup>H NMR. <sup>c</sup>  $M_{n, calc} = (M/I) \times (\% \text{ conv.}) \times (\text{mol. wt. of lactide})$ . <sup>d</sup>  $M_{n, obs}$  values were determined by GPC in THF vs polystyrene standards and were corrected with a Mark-Houwink factor = 0.58.

**SI Figure 15.** <sup>1</sup>H NMR spectrum of PLLA isolated from polymerization with **1** in toluene in presence of 4-fluorophenol at 100 °C, Table 2, entry 2.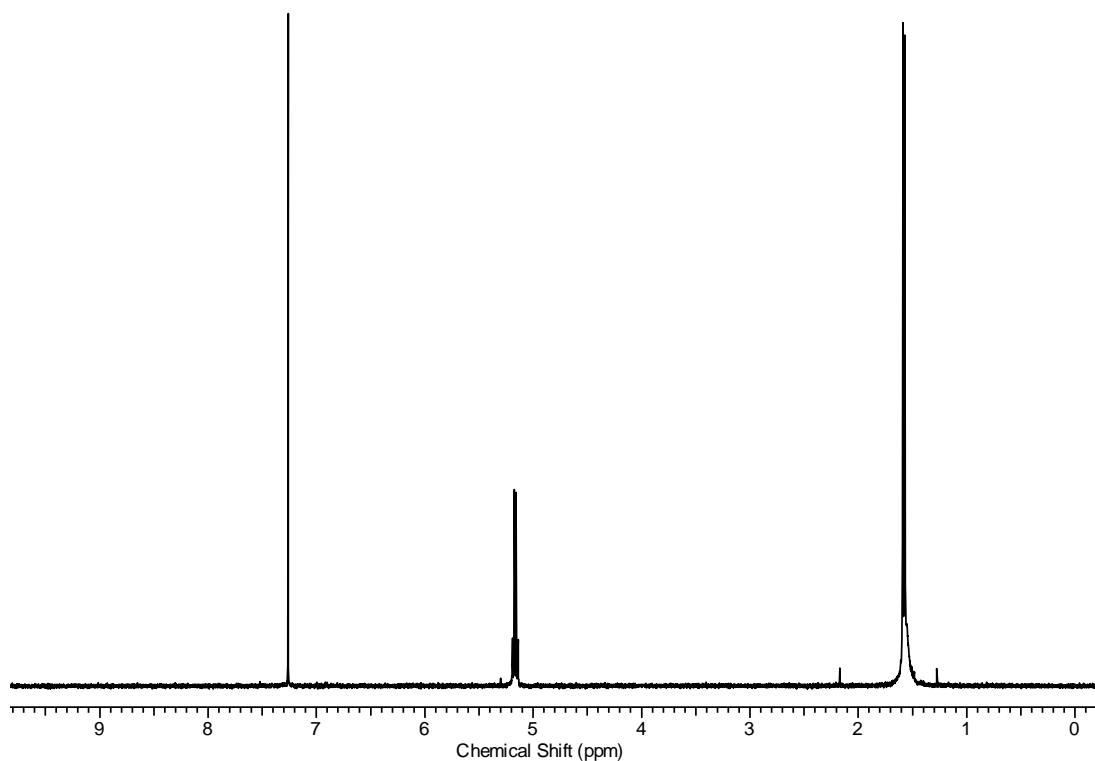

**SI Figure 16.**  $\{^1\text{H}\}^1\text{H}$  NMR spectrum of isolated PLLA from polymerization with **1** in toluene in presence of 4-fluorophenol at 100 °C.

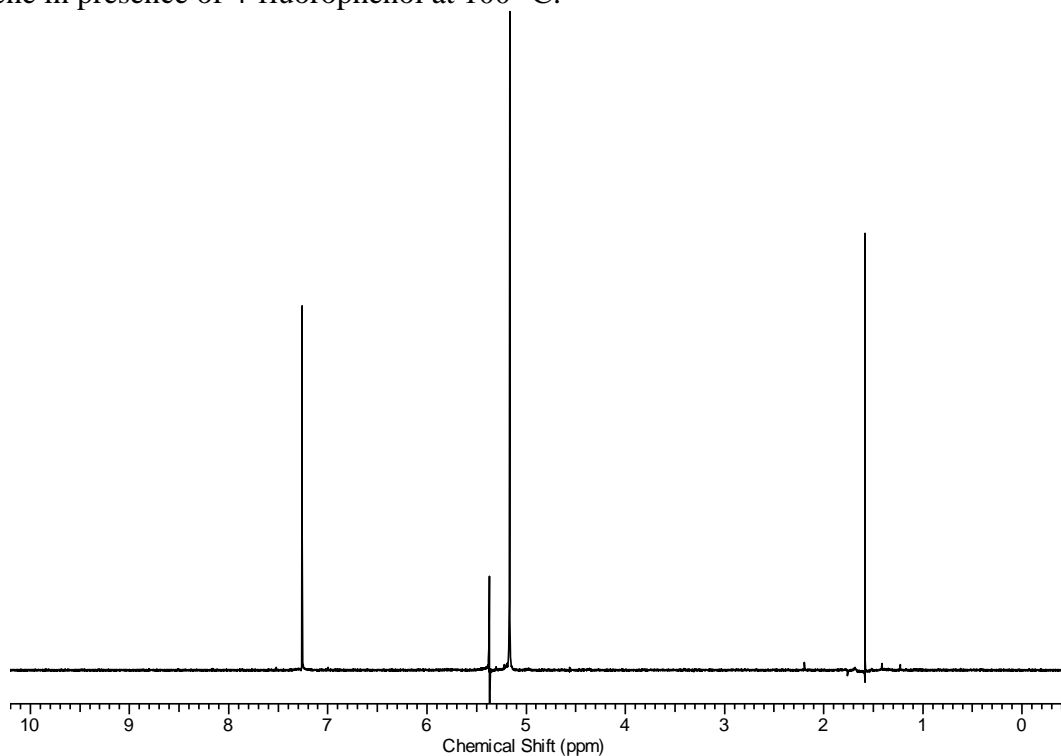

Zoom in of  $\{^1\text{H}\}^1\text{H}$  NMR spectrum

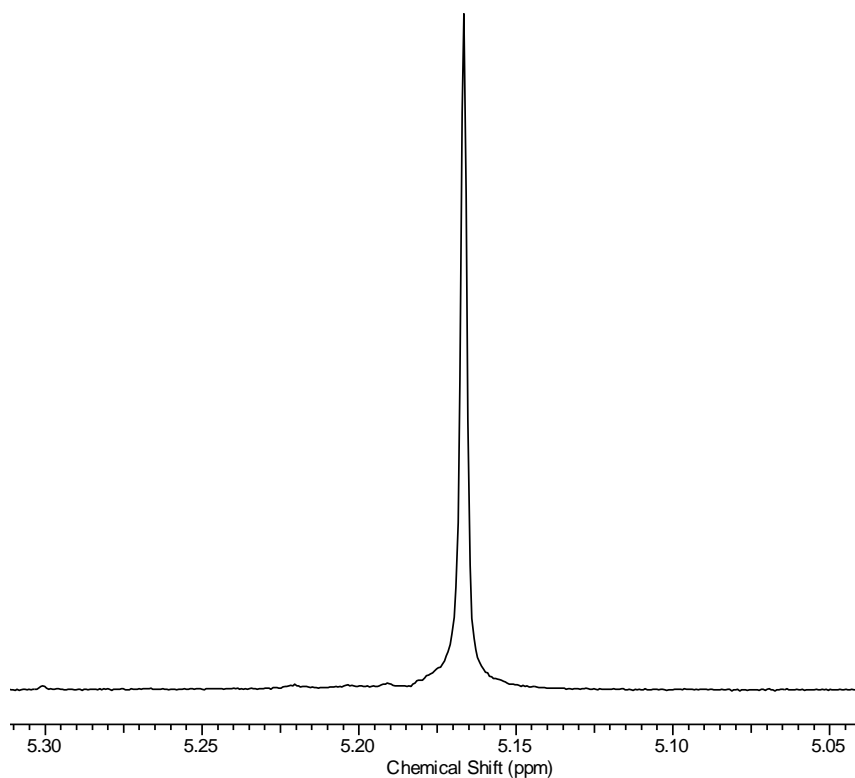

**SI Figure 17.**  $M_n$  versus percentage conversion of PLA produced from the ROP of L-lactide by **1** with 250 mg of L-lactide with 4-fluorophenol ([L-lac]/[**1**]/[co-catalyst] = 100/1/1) and 30 min of reaction time at 100 °C in toluene. PDI values are provided in parentheses.

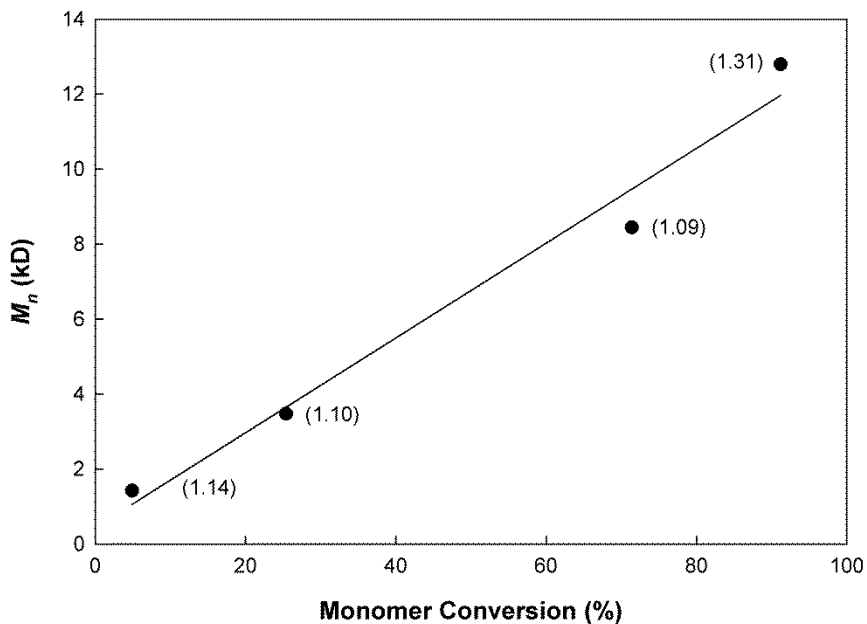

**SI Figure 18.**  $M_n$  versus percentage conversion of PLA produced from the ROP of L-lactide by **1** with 250 mg of L-lactide in absence of 4-fluorophenol ([L-lac]/[**1**]/[co-catalyst] = 100/1/0) and 30 min of reaction time at 100 °C in toluene. PDI values are provided in parentheses.

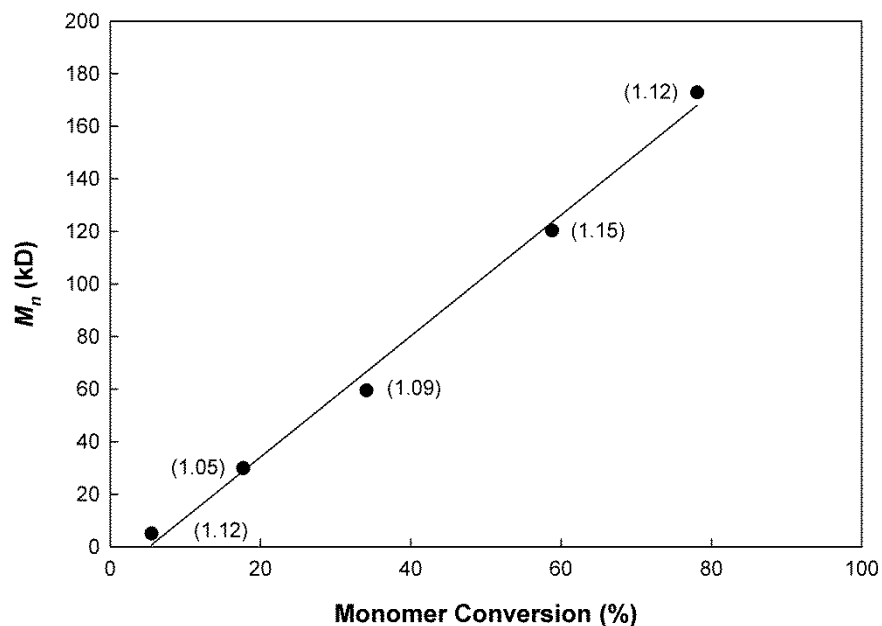

**SI Figure 19.** Chromatograms of polymeric materials isolated in double feed experiment with **1**. Chromatogram of isolated PLLA after treatment of **1** with 250 mg of L-lactide with 4-fluorophenol ( $[L\text{-lac}]/[1]/[\text{co-catalyst}] = 100/1/1$ ) and 30 min of reaction time in toluene at 100 °C (solid line,  $M_n = 16.8$  kD, PDI= 1.60) and chromatogram of isolated PLLA after second addition of 250 mg of L-lactide and 30 min of reaction time (dashed line,  $M_n = 25.7$  kD, PDI= 1.56).

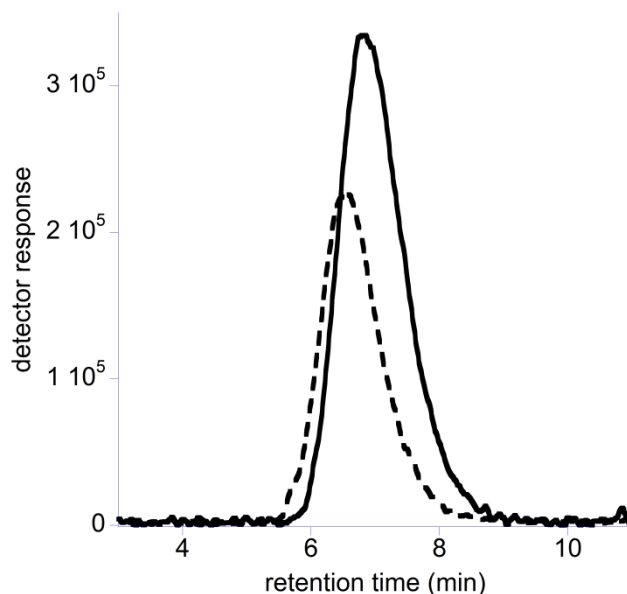

**SI Figure 20.** Chromatograms of polymeric materials isolated in double feed experiment with **1**. Chromatogram of isolated PLLA after treatment of **1** with 250 mg of L-lactide in absence of 4-fluorophenol ( $[L\text{-lac}]/[1]/[\text{co-catalyst}] = 100/1/0$ ) and 30 min of reaction time in toluene at 100 °C (solid line,  $M_n = 68.9$  kD, PDI= 1.08) and chromatogram of isolated PLLA after second addition of 250 mg of L-lactide and 30 min of reaction time (dashed line,  $M_n = 162.4$  kD, PDI= 1.17).

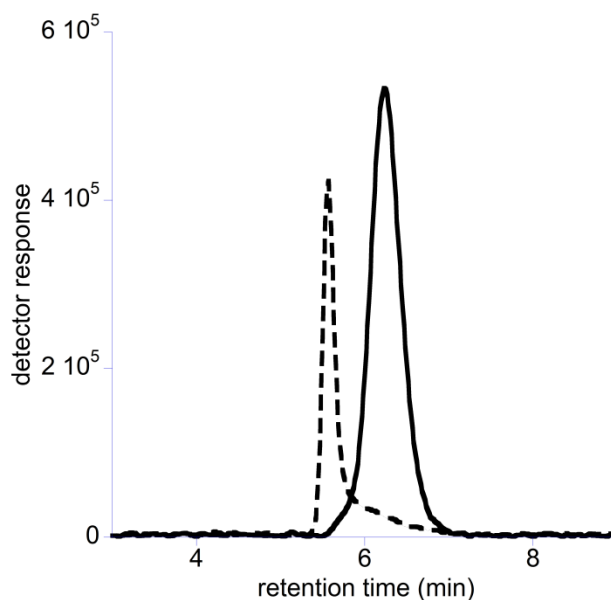



SI Figure 21.  $^1\text{H}$  NMR spectrum of **1** treated with 4-fluorophenol at 300 K.

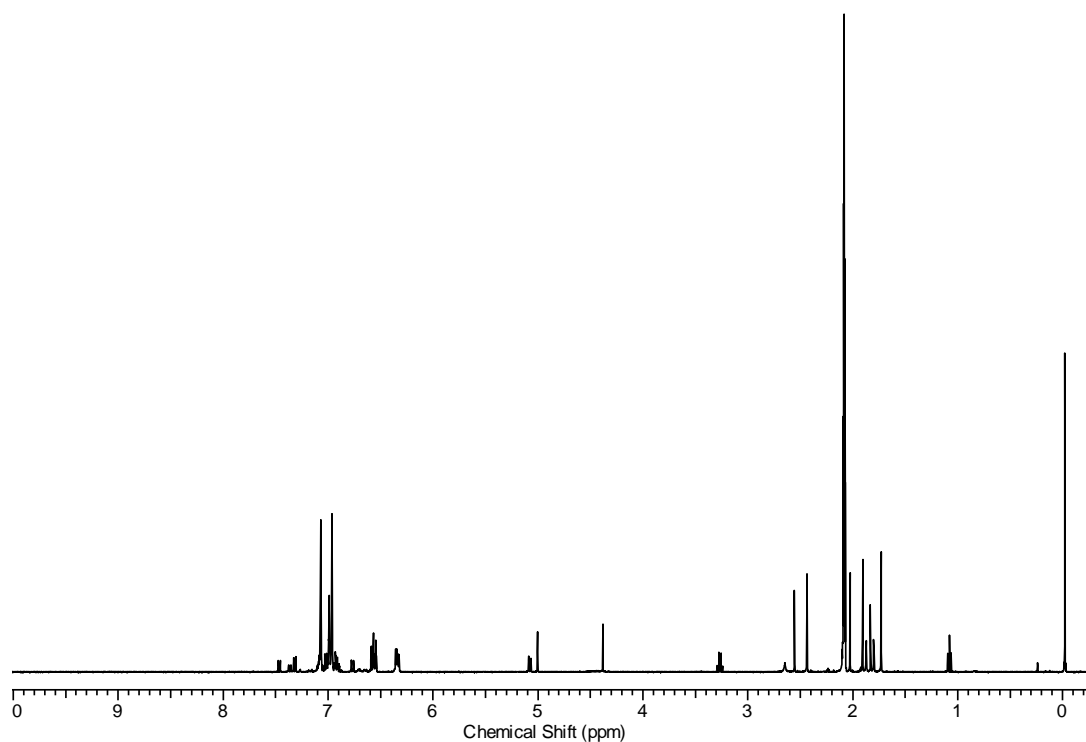

Zoom of  $^1\text{H}$  NMR spectrum from above where compound **1**, pro-ligand (PL) and the in situ alkoxide (A) signals are annotated.

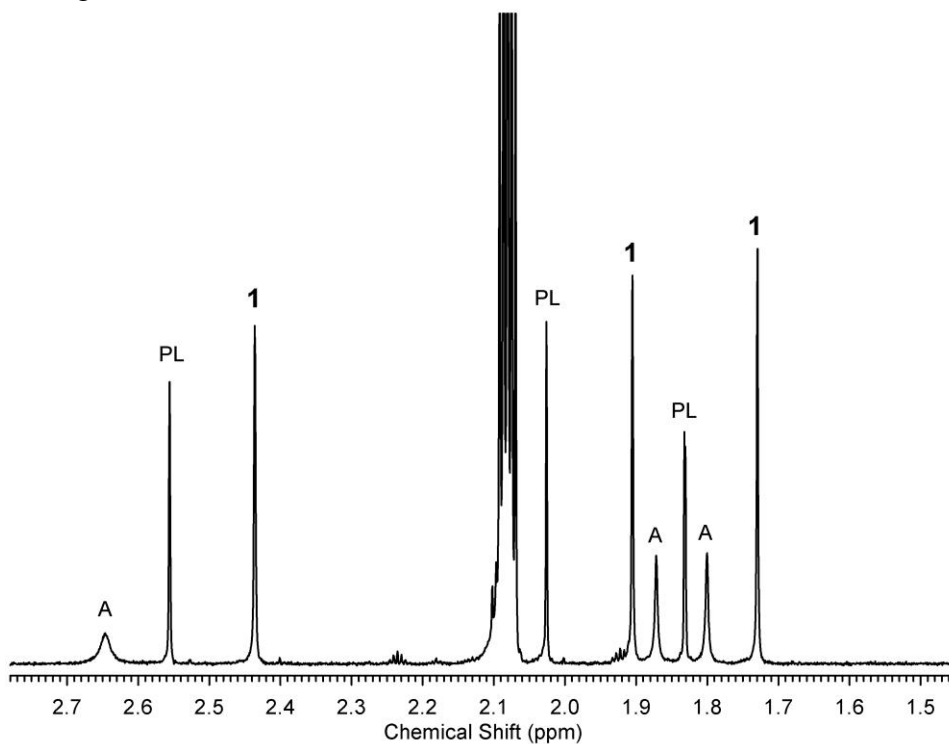

**SI Figure 22.**  $^{19}\text{F}$  NMR spectrum of **1** treated with 4-fluorophenol at 300 K.

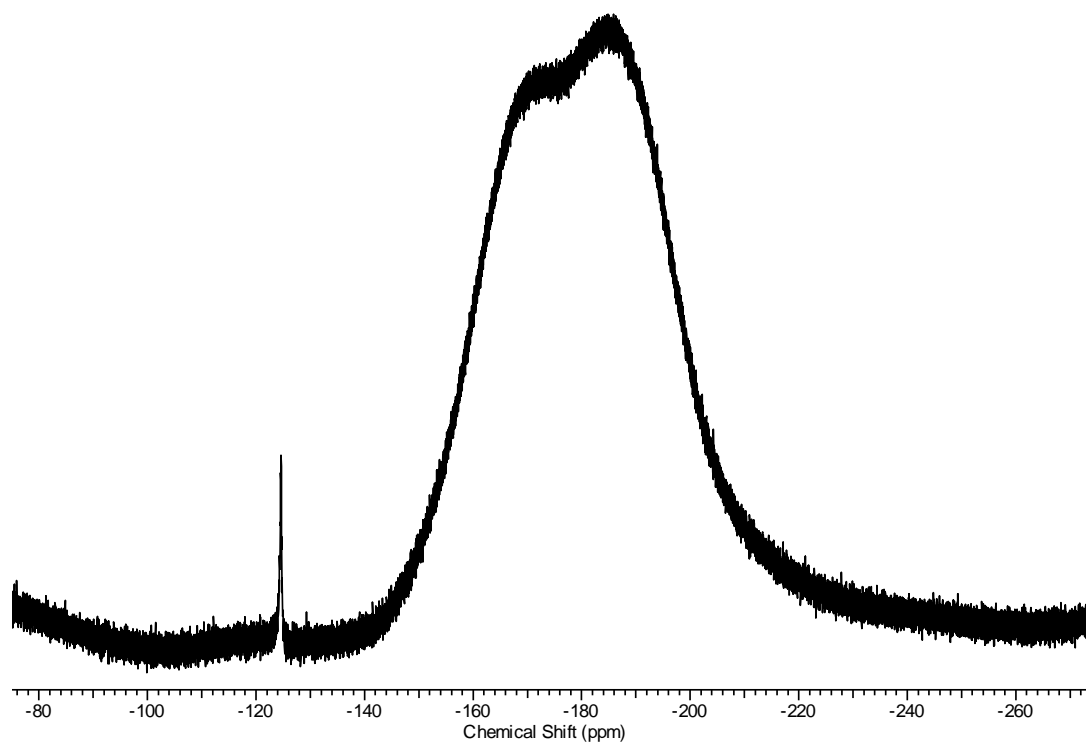

**SI Figure 23.**  $^{19}\text{F}$  NMR spectrum of 4-fluorophenol at 300 K.

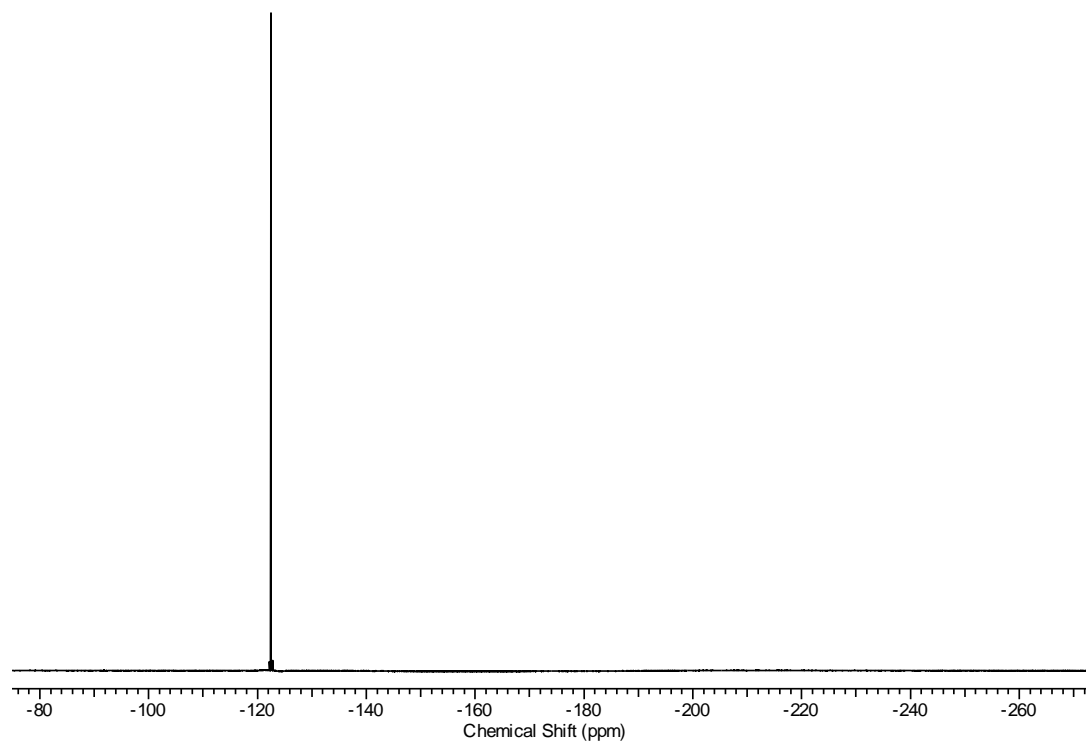

Supplement: c4dt01607f1.pdf [file c4dt01607f1.pdf]
